# Supplementary material for: Analysis of the Mitogenomes of Two Helotid Species Provides New Insights into the Phylogenetic Relationship of the Basal Cucujoidea (Insecta: Coleoptera)
Source: MDPI journal article supplement (doi:10.3390/biology12010135), 2023-01-14
Supplement: s1 [file s1]

Table S1. Annotation of the mt genome of *Helota thoracica* and *Helota yehi*.

| Gene                           | Direction | Location<br>Start | End       | Size      | Anticodon | Codon<br>Start | Stop            | InteNgenic<br>nucleotides |
|--------------------------------|-----------|-------------------|-----------|-----------|-----------|----------------|-----------------|---------------------------|
| <i>tRNA<sup>Ile</sup></i>      | J         | 1                 | 64        | 64        | GAU       |                |                 | -3/19                     |
| <i>tRNA<sup>Gln</sup></i>      | N         | 62/84             | 130/152   | 69        | UUG       |                |                 | -1/-2                     |
| <i>tRNA<sup>Met</sup></i>      | J         | 130/151           | 198/221   | 69/71     | CAU       |                |                 | 0/17                      |
| <i>ND2</i>                     | J         | 199/239           | 1211/1234 | 1013/996  |           | ATT/ATA        | TA-<br>tRNA/TAA | 0                         |
| <i>tRNA<sup>Trp</sup></i>      | J         | 1212/1235         | 1278/1301 | 67        | UCA       |                |                 | 0                         |
| <i>tRNA<sup>Cys</sup></i>      | N         | 1279/1302         | 1341/1365 | 63/64     | GCA       |                |                 | 0                         |
| <i>tRNA<sup>Tyr</sup></i>      | N         | 1342/1366         | 1406/1430 | 65        | GUA       |                |                 | -8                        |
| <i>COX1</i>                    | J         | 1399/1423         | 2919/2970 | 1521/1548 |           | ATT            | T-<br>tRNA/TAA  | 22/-6                     |
| <i>tRNA<sup>Leu(UUR)</sup></i> | J         | 2942/2965         | 3006/3031 | 65/67     | UAA       |                |                 | 0/-1                      |
| <i>COX2</i>                    | J         | 3007/3031         | 3694/3718 | 688       |           | ATA/ATT        | T-<br>tRNA      | 0                         |
| <i>tRNA<sup>Lys</sup></i>      | J         | 3695/3719         | 3765/3788 | 71/70     | CUU       |                |                 | -1/0                      |
| <i>tRNA<sup>Asp</sup></i>      | J         | 3765/3789         | 3830/3853 | 66/65     | GUC       |                |                 | 0                         |
| <i>ATP8</i>                    | J         | 3831/3854         | 3986/4009 | 156       |           | ATT            | TAG             | -4/-7                     |
| <i>ATP6</i>                    | J         | 3983/4003         | 4654/4677 | 672/675   |           | ATA/ATG        | TAA             | -1                        |
| <i>COX3</i>                    | J         | 4654/4677         | 5440/5463 | 787       |           | ATG            | T-<br>tRNA      | 0                         |
| <i>tRNA<sup>Gly</sup></i>      | J         | 5441/5464         | 5504/5527 | 64        | UCC       |                |                 | 0                         |
| <i>ND3</i>                     | J         | 5505/5528         | 5856/5879 | 352       |           | ATT            | T-<br>tRNA      | 0                         |

|                                |   |            |             |           |     |         |             |       |
|--------------------------------|---|------------|-------------|-----------|-----|---------|-------------|-------|
| <i>tRNA<sup>Ala</sup></i>      | J | 5857/5880  | 5921/5944   | 65        | UGC |         |             | 0     |
| <i>tRNA<sup>Arg</sup></i>      | J | 5922/5945  | 5984/6007   | 63        | UCG |         |             | -1    |
| <i>tRNA<sup>Asn</sup></i>      | J | 5984/6007  | 6047/6070   | 64        | GUU |         |             | 0     |
| <i>tRNA<sup>Ser(AGN)</sup></i> | J | 6048/6071  | 6114/6137   | 67        | UCU |         |             | 0     |
| <i>tRNA<sup>Glu</sup></i>      | J | 6115/6138  | 6177/6200   | 63        | UUC |         |             | 0     |
| <i>tRNA<sup>Phe</sup></i>      | N | 6178/6201  | 6243/6264   | 66/64     | GAA |         |             | 0     |
| <i>ND5</i>                     | N | 6244/6265  | 7961/7982   | 1718      |     | ATT     | TA-<br>tRNA | 0     |
| <i>tRNA<sup>His</sup></i>      | N | 7962/7983  | 8026/8046   | 65/64     | GUG |         |             | 0     |
| <i>ND4</i>                     | N | 8027/8047  | 9357/9377   | 1331      |     | ATG     | TA-<br>tRNA | -7/-7 |
| <i>ND4L</i>                    | N | 9351/9371  | 9635/9640   | 285/270   |     | ATG/ATT | TAA         | 4/19  |
| <i>tRNA<sup>Thr</sup></i>      | J | 9640/9660  | 9701/9721   | 62        | UGU |         |             | 0     |
| <i>tRNA<sup>Pro</sup></i>      | N | 9702/9722  | 9766/9785   | 65/64     | UGG |         |             | 10/1  |
| <i>ND6</i>                     | J | 9777/9787  | 10262/10281 | 486/495   |     | ATA     | TAA         | -1/5  |
| <i>CYTB</i>                    | J | 10262/1028 | 11399/11421 | 1138/1135 |     | ATG/ATC | T-<br>tRNA  | 0     |
|                                |   | 7          |             |           |     |         |             |       |
| <i>tRNA<sup>Ser(UCN)</sup></i> | J | 11400/1142 | 11464/11486 | 65        | UGA |         |             | 17    |
|                                |   | 2          |             |           |     |         |             |       |
| <i>ND1</i>                     | N | 11482/1150 | 12432/12454 | 951       |     | TTG     | TAG         | 0     |
|                                |   | 4          |             |           |     |         |             |       |
| <i>tRNA<sup>Leu(CUN)</sup></i> | N | 12433/1245 | 12497/12519 | 65        | UAG |         |             | 0/30  |
|                                |   | 5          |             |           |     |         |             |       |
| <i>rrnL</i>                    | N | 12498/1255 | 13783/13807 | 1286/1258 |     |         |             | 0     |
|                                |   | 0          |             |           |     |         |             |       |
| <i>tRNA<sup>Val</sup></i>      | N | 13784/1380 | 13852/13876 | 69        | UAC |         |             | 0     |

|             |   |   |            |             |           |   |
|-------------|---|---|------------|-------------|-----------|---|
| <i>rrnS</i> | N | 8 | 13853/1387 | 14638/14635 | 786/759   | 0 |
|             |   | 7 |            |             |           |   |
| Dloop       |   | 6 | 14639/1463 | 16112/16401 | 1474/1766 |   |

Note: N and J indicate that the genes are located in the minor (N) and major (J) strand. The '/' indicated that these from left to right were *H.thoracica* and *H.yehi*. Intergenic sequence: positive numbers/negative numbers indicate intergenic/overlapping regions between adjacent genes.
